# Supplementary material
Source: publisher figshare collection journal article supplement (https://karger.figshare.com/ndownloader/files/25745873)
Supplement: Supplementary file 1 [file 25745873]

**ONLINE SUPPLEMENTAL MATERIAL**

**SUPPLEMENTAL TABLES**

**Incidence of Stroke and Ischemic Stroke Subtypes: A Community-Based Study in Brno, Czech Republic**

**TABLE I. Incidence of hospitalized stroke per 100,000 population in Brno in 2011: standardized incidence, and age and sex distribution**

| **STROKE TYPE/AGE CATEGORY (YEARS)** | **COUNT** | **CRUDE INCIDENCE (BRNO CITY POPULATION)** | | **INCIDENCE ADJUSTED FOR CZECH POPULATION (2010 CENSUS)** | | **INCIDENCE ADJUSTED FOR WHO POPULATION (2000 STANDARD)** | | **INCIDENCE ADJUSTED FOR U.S. POPULATION (2000 STANDARD)** | | **INCIDENCE ADJUSTED FOR EU-27+EFTA POPULATION (2010 STANDARD)** | | **Percent women e** | **CRUDE INCIDENCE (BRNO CITY POPULATION) MEN** | | **CRUDE INCIDENCE (BRNO CITY POPULATION) WOMEN** | | **INCIDENCE ADJUSTED FOR CZECH POPULATION (2010 CENSUS) - MEN** | | **INCIDENCE ADJUSTED FOR CZECH POPULATION (2010 CENSUS) - WOMEN** | |
| --- | --- | --- | --- | --- | --- | --- | --- | --- | --- | --- | --- | --- | --- | --- | --- | --- | --- | --- | --- | --- |
|  |  | **Incidence** | **C.I.** | **Incidence** | **C.I.** | **Incidence** | **C.I.** | **Incidence** | **C.I.** | **Incidence** | **C.I.** |  | **Incidence** | **C.I.** | **Incidence** | **C.I.** | **Incidence** | **C.I.** | **Incidence** | **C.I.** |
| **Total Stroke(I60+I61+I63)** | 808 | 213 | (198.76,228.43) | 192.4 | (178.70,206.90) | 107.4 | (97.20,118.34) | 157.4 | (145.05,170.58) | 195.1 | (181.31,209.71) | 48.9 | 226.1 | (204.80,248.98) | 201.2 | (181.87,222.09) | 207.2 | (186.86,229.17) | 179.4 | (161.13,199.13) |
| **Age 0-44** | 21 | 10 | (6.20,15.32) | 6 | (3.52,8.70) | 7 | (4.47,11.04) | 7 | (4.04,9.98) | 6 | (3.57,8.82) | 43 | 11 | (5.79,19.56) | 9 | (4.02,16.69) | 7 | (3.44,11.62) | 5 | (2.18,9.06) |
| **Age 45-54** | 47 | 97 | (71.34,129.11) | 13 | (9.28,16.80) | 11 | (8.14,14.73) | 13 | (9.62,17.41) | 14 | (10.07,18.22) | 43 | 114 | (74.87,165.31) | 81 | (49.57,125.33) | 15 | (10.03,22.14) | 10 | (6.27,15.85) |
| **Age 55-64** | 152 | 289 | (245.28,339.31) | 42 | (35.22,48.73) | 24 | (20.28,28.06) | 25 | (21.40,29.60) | 35 | (29.92,41.39) | 32 | 426 | (347.86,516.87) | 173 | (127.90,228.56) | 60 | (49.12,72.98) | 25 | (18.66,33.34) |
| **Age 65-74** | 188 | 490 | ( 422.65,565.53) | 45 | (38.50,51.52) | 25 | (21.85,29.24) | 32 | (27.91,37.34) | 43 | (36.74,49.16) | 46 | 600 | (488.31,728.46) | 405 | (324.06,499.07) | 49 | (40.26,60.07) | 40 | (32.20,49.59) |
| **Age 75-84** | 268 | 1188 | (1049.87,1338.90) | 62 | (54.80,69.89) | 29 | (25.51,32.54) | 53 | (47.08,60.04) | 67 | (59.15,75.43) | 52 | 1510 | (1260.99,1794.62) | 991 | (833.42,1170.55) | 60 | (49.92,71.05) | 64 | (53.54,75.20) |
| **Age >=85** | 132 | 1735 | (1452.06,2058.05) | 26 | (21.64,30.66) | 11 | (9.15,12.97) | 27 | (22.52,31.92) | 31 | (25.78,36.54) | 69 | 1889 | (1355.24,2562.01) | 1674 | (1348.07,2055.71) | 16 | (11.43,21.61) | 35 | (28.37,43.26) |
|  |  |  |  |  |  |  |  |  |  |  |  |  |  |  |  |  |  |  |  |  |
| **SAH (I60)** | 26 | 6.9 | (4.48,10.05) | 6.8 | (4.46,10.02) | 5.0 | (3.00,7.79) | 5.7 | (3.52,8.61) | 6.6 | (4.29,9.76) | 53.8 | 6.6 | (3.39,11.47) | 7.1 | (3.90,11.97) | 6.6 | (3.39,11.47) | 7.1 | (3.85,11.89) |
| **Age 0-44** | 3 | 1.4 | (0.30,4.18) | 0.8 | (0.17,2.38) | 1.0 | (0.21,3.02) | 0.9 | (0.19,2.73) | 0.8 | (0.17,2.41) | 66.7 | 0.9 | (0.02,5.20) | 2.0 | (0.24,7.06) | 0.6 | (0.01,3.09) | 1.1 | (0.13,3.83) |
| **Age 45-54** | 7 | 14.5 | (5.81,29.79) | 1.9 | (0.76,3.88) | 1.6 | (0.66,3.40) | 1.9 | (0.78,4.02) | 2.0 | (0.82,4.20) | 42.9 | 16.8 | (4.59,43.10) | 12.2 | (2.51,35.57) | 2.3 | (0.61,5.77) | 1.5 | (0.32,4.50) |
| **Age 55-64** | 10 | 19.0 | (9.13,35.02) | 2.7 | (1.31,5.03) | 1.6 | (0.76,2.90) | 1.7 | (0.797,3.06) | 2.3 | (1.11,4.27) | 60.0 | 16.6 | (4.51,42.38) | 21.2 | (7.77,46.08) | 2.3 | (0.64,5.98) | 3.1 | (1.13,6.72) |
| **Age 65-74** | 3 | 7.8 | (1.61,22.86) | 0.7 | (0.15,2.08) | 0.4 | (0.08,1.18) | 0.5 | (0.11,1.51) | 0.7 | (0.14,1.99) | 66.7 | 5.9 | (0.15,33.07) | 9.3 | (1.13,33.60) | 0.5 | (0.01,2.73) | 0.9 | (0.11,3.34) |
| **Age 75-84** | 3 | 13.3 | (2.74,38.86) | 0.7 | (0.14,2.03) | 0.3 | (0.07,0.94) | 0.6 | (0.12,1.74) | 0.7 | (0.15,2.19) | 33.3 | 23.4 | (2.84,84.59) | 7.1 | (0.18,39.74) | 0.9 | (0.11,3.35) | 0.5 | (0.01,2.55) |
| **Age >=85** | 0 | 0.0 | (0.00,48.50) | 0.0 | (0.00,0.72) | 0.0 | (0.00,0.31) | 0.0 | (0.00,0.75) | 0.0 | (0.00,0.86) | N/A | 0.0 | (0.00,169.92) | 0.0 | (0.00,67.87) | 0.0 | (0.00,1.43) | 0.0 | (0.00,1.43) |
|  |  |  |  |  |  |  |  |  |  |  |  |  |  |  |  |  |  |  |  |  |
| **ICH (I61)** | 100 | 26.4 | (21.47,32.09) | 24.2 | (19.49,29.67) | 14.4 | (10.87,18.81) | 20.1 | (15.84,25.15) | 24.4 | (19.71,29.94) | 51.0 | 26.8 | (19.84,35.46) | 26.0 | (19.34,34.16) | 25.1 | (18.40,33.54) | 23.4 | (17.16,31.26) |
| **Age 0-44** | 5 | 2.4 | (0.77,5.57) | 1.4 | (0.44,3.16) | 1.7 | (0.56,4.01) | 1.6 | (0.50,3.63) | 1.4 | (0.45,3.21) | 40.0 | 2.8 | (0.58,8.18) | 2.0 | (0.24,7.06) | 1.7 | (0.34,4.86) | 1.1 | (0.13,3.83) |
| **Age 45-54** | 10 | 20.7 | (9.91,37.99) | 2.7 | (1.29,4.94) | 2.4 | (1.13,4.33) | 2.8 | (1.34,5.12) | 2.9 | (1.40,5.36) | 30.0 | 29.5 | (11.84,60.69) | 12.2 | (2.51,35.57) | 3.9 | (1.59,8.13) | 1.5 | (0.32,4.50) |
| **Age 55-64** | 22 | 41.9 | (26.26,63.43) | 6.0 | (3.77,9.11) | 3.5 | (2.17,5.25) | 3.7 | (2.29,5.53) | 5.1 | (3.20,7.74) | 40.9 | 53.8 | (28.64,91.98) | 31.8 | (14.52,60.28) | 7.6 | (4.04,12.99) | 4.6 | (2.12,8.79) |
| **Age 65-74** | 19 | 49.5 | (29.83,77.37) | 4.5 | (2.72,7.05) | 2.6 | (1.54,4.00) | 3.3 | (1.97,5.11) | 4.3 | (2.59,6.72) | 47.4 | 59.4 | (28.46,109.16) | 41.9 | (19.14,79.45) | 4.9 | (2.35,9.00) | 4.2 | (1.90,7.90) |
| **Age 75-84** | 28 | 124.1 | (82.47,179.36) | 6.5 | (4.30,9.36) | 3.0 | (2.00,4.36) | 5.6 | (3.70,8.04) | 7.0 | (4.65,10.11) | 60.7 | 128.8 | (64.29,230.44) | 121.2 | (70.63,194.13) | 5.1 | (2.55,9.12) | 7.8 | (4.54,12.47) |
| **Age >=85** | 16 | 210.4 | (120.24,341.61) | 3.1 | (1.79,5.09) | 1.3 | (0.76,2.15) | 3.3 | (1.86,5.30) | 3.7 | (2.13,6.06) | 68.8 | 230.3 | (74.78,537.46) | 202.4 | (101.03,362.14) | 1.9 | (0.63,4.53) | 4.3 | (2.13,7.62) |
|  |  |  |  |  |  |  |  |  |  |  |  |  |  |  |  |  |  |  |  |  |
| **IS (I63)** | 682 | 180.0 | (166.71,193.99) | 161.4 | (148.85,174.71) | 88.0 | (78.77,97.92) | 131.7 | (120.37,143.75) | 164.1 | (151.43,177.49) | 48.4 | 192.7 | (173.09,213.91) | 168.1 | (150.46,187.27) | 175.5 | (156.82,195.81) | 148.9 | (132.29,166.96) |
| **Age 0-44** | 13 | 6.2 | (3.30,10.61) | 3.5 | (1.88,6.03) | 4.5 | (2.38,7.65) | 4.0 | (2.15,6.91) | 3.6 | (1.90,6.11) | 38.5 | 7.5 | (3.22,14.71) | 4.9 | (1.59,11.40) | 4.4 | (1.92,8.74) | 2.7 | (0.86,6.19) |
| **Age 45-54** | 30 | 62.0 | (41.81,88.47) | 8.1 | (5.44,11.51) | 7.1 | (4.77,10.09) | 8.4 | (5.64,11.93) | 8.7 | (5.90,12.48) | 46.7 | 67.3 | (38.48,109.34) | 56.8 | (31.06,95.31) | 9.0 | (5.15,14.64) | 7.2 | (3.93,12.06) |
| **Age 55-64** | 120 | 228.5 | (189.47,273.26) | 32.8 | (27.21,39.24) | 18.9 | (15.67,22.60) | 19.9 | (16.53,23.84) | 27.9 | (23.11,33.33) | 28.3 | 355.8 | (284.63,439.46) | 120.0 | (83.08,167.63) | 50.2 | (40.19,62.05) | 17.5 | (12.12,24.45) |
| **Age 65-74** | 166 | 432.9 | (369.51,503.94) | 39.4 | (33.66,45.91) | 22.4 | (19.10,26.05) | 28.6 | (24.40,33.28) | 37.6 | (32.12,43.80) | 45.8 | 534.2 | (429.58,656.65) | 353.4 | (278.47,442.38) | 44.0 | (35.42,54.14) | 35.1 | (27.67,43.96) |
| **Age 75-84** | 237 | 1050.4 | (920.95,1193.04) | 54.8 | (48.07,62.28) | 25.5 | (22.38,28.99) | 47.1 | (41.30,53.50) | 59.2 | (51.89,67.21) | 51.1 | 1358.2 | (1122.27,1628.98) | 863.0 | (716.09,1031.16) | 53.8 | (44.43,64.49) | 55.4 | (46.00,66.24) |
| **Age >=85** | 116 | 1525.1 | (1260.23,1829.27) | 22.7 | (18.78,27.26) | 9.6 | (7.94,11.52) | 23.7 | (19.54,28.37) | 27.1 | (22.37,32.47) | 69.0 | 1658.2 | (1161.40,2295.68) | 1471.9 | (1167.16,1831.96) | 14.0 | (9.79,19.36) | 31.0 | (24.56,38.55) |

**Abbreviations:** IS ischemic stroke; SAH subarachnoid hemorrhage; ICH intracerebral hemorrhage.

**TABLE II.** **Incidence of Ischemic Stroke Subtypes (TOAST) per 100,000 individuals in Brno in 2011: standardized incidence, and age and sex distribution**

| **STROKE TYPE/AGE CATEGORY (YEARS)** | **COUNT** | **CRUDE INCIDENCE (BRNO CITY POPULATION)** | | **INCIDENCE ADJUSTED FOR CZECH POPULATION (2010 CENSUS)** | | **INCIDENCE ADJUSTED FOR WHO POPULATION (2000 STANDARD)** | | **INCIDENCE ADJUSTED FOR U.S. POPULATION (2000 STANDARD)** | | **INCIDENCE ADJUSTED FOR EU-27+EFTA POPULATION (2010 STANDARD)** | | **Percent women** | **CRUDE INCIDENCE (BRNO CITY POPULATION) MEN** | | **CRUDE INCIDENCE (BRNO CITY POPULATION) WOMEN** | | **INCIDENCE ADJUSTED FOR CZECH POPULATION (2010 CENSUS) - MEN** | | **INCIDENCE ADJUSTED FOR CZECH POPULATION (2010 CENSUS) - WOMEN** | |
| --- | --- | --- | --- | --- | --- | --- | --- | --- | --- | --- | --- | --- | --- | --- | --- | --- | --- | --- | --- | --- |
|  |  | **Incidence** | **C.I.** | **Incidence** | **C.I.** | **Incidence** | **C.I.** | **Incidence** | **C.I.** | **Incidence** | **C.I.** |  | **Incidence** | **C.I.** | **Incidence** | **C.I.** | **Incidence** | **C.I.** | **Incidence** | **C.I.** |
| **Ischemic stroke (I63)** | 682 | 180.0 | (166.71,193.99) | 161.4 | (148.85,174.71) | 88.0 | (78.77,97.92) | 131.7 | (120.37,143.75) | 164.1 | (151.43,177.49) | 48 | 192.7 | (173.09,213.91) | 168.1 | (150.46,187.27) | 175.5 | (156.82,195.81) | 148.9 | (132.29,166.96) |
| **Age 0-44** | 13 | 6.2 | (3.30,10.61) | 3.5 | (1.88,6.03) | 4.5 | (2.38,7.65) | 4.0 | (2.15,6.91) | 3.6 | (1.90,6.11) | 38 | 7.5 | (3.22,14.71) | 4.9 | (1.59,11.40) | 4.4 | (1.92,8.74) | 2.7 | (0.86,6.19) |
| **Age 45-54** | 30 | 62.0 | (41.81,88.47) | 8.1 | (5.44,11.51) | 7.1 | (4.77,10.09) | 8.4 | (5.64,11.93) | 8.7 | (5.90,12.48) | 47 | 67.3 | (38.48,109.34) | 56.8 | (31.06,95.31) | 9.0 | (5.15,14.64) | 7.2 | (3.93,12.06) |
| **Age 55-64** | 120 | 228.5 | (189.47,273.26) | 32.8 | (27.21,39.24) | 18.9 | (15.67,22.60) | 19.9 | (16.53,23.84) | 27.9 | (23.11,33.33) | 28 | 355.8 | (284.63,439.46) | 120.0 | (83.08,167.63) | 50.2 | (40.19,62.05) | 17.5 | (12.12,24.45) |
| **Age 65-74** | 166 | 432.9 | (369.51,503.94) | 39.4 | (33.66,45.91) | 22.4 | (19.10,26.05) | 28.6 | (24.40,33.28) | 37.6 | (32.12,43.80) | 46 | 534.2 | (429.58,656.65) | 353.4 | (278.47,442.38) | 44.0 | (35.42,54.14) | 35.1 | (27.67,43.96) |
| **Age 75-84** | 237 | 1050.4 | (920.95,1193.04) | 54.8 | (48.07,62.28) | 25.5 | (22.38,28.99) | 47.1 | (41.30,53.50) | 59.2 | (51.89,67.21) | 51 | 1358.2 | (1122.27,1628.98) | 863.0 | (716.09,1031.16) | 53.8 | (44.43,64.49) | 55.4 | (46.00,66.24) |
| **Age >=85** | 116 | 1525.1 | (1260.23,1829.23) | 22.7 | (18.78,27.26) | 9.6 | (7.94,11.52) | 23.7 | (19.54,28.37) | 27.1 | (22.37,32.47) | 69 | 1658.2 | (1161.40,2295.68) | 1471.9 | (1167.16,1831.96) | 14.0 | (9.79,19.36) | 31.0 | (24.56,38.55) |
|  |  |  |  |  |  |  |  |  |  |  |  |  |  |  |  |  |  |  |  |  |
| **Large Artery Athero-sclerosis** | 189 | 49.9 | (43.02,57.51) | 45.8 | (39.21,53.11) | 25.8 | (20.95,31.46) | 36.2 | (30.37,42.76) | 45.4 | (38.90,52.75) | 39 | 63.5 | (52.47,76.16) | 37.2 | (29.15,46.76) | 59.2 | (48.59,71.49) | 33.5 | (25.91,42.66) |
| **Age 0-44** | 4 | 1.9 | (0.52,4.89) | 1.1 | (0.30,2.78) | 1.4 | (0.37,3.52) | 1.2 | (0.34,3.18) | 1.1 | (0.30,2.81) | 75 | 0.9 | (0.02,5.20) | 2.9 | (0.60,8.57) | 0.6 | (0.01,3.09) | 1.6 | (0.33,4.65) |
| **Age 45-54** | 11 | 22.7 | (11.34,40.66) | 3.0 | (1.48,5.29) | 2.6 | (1.29,4.64) | 3.1 | (1.53,5.48) | 3.2 | (1.60,5.74) | 55 | 21.0 | (6.83,49.10) | 24.3 | (8.93,52.99) | 2.8 | (0.92,6.58) | 3.1 | (1.13,6.70) |
| **Age 55-64** | 47 | 89.5 | (65.76,119.02) | 12.9 | (9.44,17.09) | 7.4 | (5.44,9.84) | 7.8 | (5.74,10.38) | 10.9 | (8.02,14.52) | 17 | 161.4 | (114.75,220.60) | 28.2 | (12.19,55.62) | 22.8 | ( 16.20,31.15) | 4.1 | (1.78,8.11) |
| **Age 65-74** | 49 | 127.8 | (94.53,168.92) | 11.6 | (8.61,15.39) | 6.6 | (4.89,8.73) | 8.4 | (6.24,11.15) | 11.1 | (8.22,14.68) | 35 | 189.9 | (129.92,268.15) | 79.1 | (46.05,126.58) | 15.7 | (10.71,22.11) | 7.9 | (4.58,12.58) |
| **Age 75-84** | 55 | 243.8 | (183.64,317.30) | 12.7 | (9.59,16.56) | 5.9 | (4.46,7.71) | 10.9 | (8.23,14.23) | 13.7 | (10.35,17.88) | 45 | 351.2 | (236.98,501.43) | 178.3 | (115.39,263.21) | 13.9 | (9.38,19.85) | 11.5 | (7.41,16.91) |
| **Age >=85** | 23 | 302.4 | (191.69,453.74) | 4.5 | (2.86,6.76) | 1.9 | (1.21,2.86) | 4.7 | (2.97,7.04) | 5.4 | ( 3.40,8.06) | N/A | 414.6 | (189.56,786.96) | 257.6 | (140.83,432.19) | 3.5 | (1.60,6.64) | 5.4 | (2.96,9.09) |
|  |  |  |  |  |  |  |  |  |  |  |  |  |  |  |  |  |  |  |  |  |
| **Cardio-embolism** | 237 | 62.5 | (54.83,71.03) | 53.9 | (46.77,61.83) | 27.8 | (22.76,33.66) | 46.7 | (40.10,54.14) | 57.2 | (49.83,65.34) | 57 | 55.3 | (45.03,67.18) | 69.3 | (58.13,81.96) | 48.6 | (39.04,59.85) | 59.2 | (48.92,70.99) |
| **Age 0-44** | 3 | 1.4 | (0.30,4.18) | 0.8 | (0.17,2.38) | 1.0 | (0.21,3.02) | 0.9 | (0.19,2.73) | 0.8 | (0.17,2.41) | 0 | 2.8 | (0.58,8.18) | 0.0 | (0.00,3.60) | 1.7 | (0.34,4.86) | 0.0 | (0.00,1.96) |
| **Age 45-54** | 9 | 18.6 | (8.50,35.29) | 2.4 | (1.11,4.59) | 2.1 | (0.97,4.03) | 2.5 | (1.15,4.76) | 2.6 | (1.20,4.98) | 33 | 25.2 | (9.27,54.95) | 12.2 | (2.51,35.57) | 3.4 | (1.24,7.36) | 1.5 | (0.32,4.50) |
| **Age 55-64** | 16 | 30.5 | (17.42,49.48) | 4.4 | (2.50,7.11) | 2.5 | (1.44,4.1) | 2.7 | (1.52,4.32) | 3.7 | (2.12,6.04) | 19 | 53.8 | (28.64,91.98) | 10.6 | (2.18,30.93) | 7.6 | (4.0,12.99) | 1.5 | (0.32,4.51) |
| **Age 65-74** | 47 | 122.6 | (90.05,162.97) | 11.2 | (8.20,14.85) | 6.3 | (4.66,8.43) | 8.1 | (5.95,10.76) | 10.7 | (7.83,14.17) | 53 | 130.6 | (81.84,197.71) | 116.3 | (75.24,171.63) | 10.8 | (6.75,16.30) | 11.6 | (7.48,17.05) |
| **Age 75-84** | 96 | 425.5 | (344.65,519.60) | 22.2 | (17.99,27.12) | 10.3 | (8.38,12.63) | 19.1 | (15.45,23.30) | 24.0 | (19.42,29.27) | 57 | 480.0 | (344.48,651.23) | 392.3 | (295.51,510.59) | 19.0 | (13.64,25.78) | 25.2 | (18.98,32.80) |
| **Age >=85** | 66 | 867.7 | (671.11,1103.97) | 12.9 | (10.00,16.45) | 5.5 | (4.23,6.96) | 13.5 | (10.41,17.12) | 15.4 | (11.91,19.60) | 76 | 737.0 | (421.25,1196.82) | 920.0 | (682.81,1212.86) | 6.2 | (3.55,10.09) | 19.4 | (14.37,25.52) |
|  |  |  |  |  |  |  |  |  |  |  |  |  |  |  |  |  |  |  |  |  |
| **Lacunar** | 160 | 42.2 | (35.93,49.29) | 38.8 | (32.76,45.58) | 21.6 | (17.18,26.83) | 30.3 | (25.05,36.42) | 38.4 | (32.45,45.21) | 44 | 49.3 | (39.62,60.56) | 35.7 | (27.80,45.06) | 45.4 | (36.12,56.24) | 32.7 | (25.18,41.73) |
| **Age 0-44** | 3 | 1.4 | (0.30,4.18) | 0.8 | (0.17,2.38) | 1.0 | (0.21,3.02) | 0.9 | (0.19,2.73) | 0.8 | (0.17,2.41) | 67 | 0.9 | (0.02,5.20) | 2.0 | (0.24,7.06) | 0.6 | (0.01,3.09) | 1.1 | (0.13,3.83) |
| **Age 45-54** | 7 | 14.5 | (5.81,29.79) | 1.9 | (0.76,3.88) | 1.6 | (0.66,3.40) | 1.9 | (0.78,4.02) | 2.0 | (0.82,4.20) | 29 | 21.0 | (6.83,49.10) | 8.1 | (0.98,29.31) | 2.8 | (0.92,6.58) | 1.0 | (0.12,3.71) |
| **Age 55-64** | 34 | 64.7 | (44.84,90.48) | 9.3 | (6.44,12.99) | 5.4 | (3.71,7.48) | 5.6 | (3.91,7.89) | 7.9 | (5.47,11.04) | 32 | 95.2 | (60.33,142.80) | 38.8 | (19.37,69.44) | 13.4 | (8.52,20.16) | 5.7 | (2.83,10.13) |
| **Age 65-74** | 49 | 127.8 | (94.53,168.92) | 11.6 | (8.61,15.39) | 6.6 | (4.89,8.73) | 8.4 | (6.24,11.15) | 11.1 | (8.22,14.68) | 49 | 148.4 | (96.03,219.06) | 111.6 | (71.51,166.07) | 12.2 | (7.92,18.06) | 11.1 | (7.11,16.50) |
| **Age 75-84** | 57 | 252.6 | (191.34,327.32) | 13.2 | (9.99,17.09) | 6.1 | (4.65,7.95) | 11.3 | (8.58,14.68) | 14.2 | (10.78,18.44) | 46 | 363.0 | (246.61,515.19) | 185.4 | (121.13,271.71) | 14.4 | (9.76,20.40) | 11.9 | (7.78,17.46) |
| **Age >=85** | 10 | 131.5 | (63.05,241.79) | 2.0 | (0.94,3.60) | 0.8 | (0.40,1.52) | 2.0 | (0.98,3.75) | 2.3 | (1.12,4.29) | 50 | 230.3 | (74.78,537.46) | 92.0 | (29.87,214.69) | 1.9 | (0.63,4.53) | 1.9 | (0.63,4.52) |
|  |  |  |  |  |  |  |  |  |  |  |  |  |  |  |  |  |  |  |  |  |
| **Other** | 47 | 12.4 | (9.11,16.49) | 11.6 | (8.43,15.57) | 6.2 | (3.96,9.27) | 8.5 | (5.78,11.93) | 11.1 | (7.80,15.00) | 49 | 13.1 | (8.42,19.55) | 11.7 | (7.43,17.58) | 12.2 | (7.71,18.47) | 11.0 | (6.86,16.71) |
| **Age 0-44** | 0 | 0.0 | (0.00,1.76) | 0.0 | (0.00,1.00) | 0.0 | (0.00,1.27) | 0.0 | (0.00,1.15) | 0.0 | (0.00,1.01) | N/A | 0.0 | (0.00,3.44) | 0.0 | (0.00,3.60) | 0.0 | (0.00,2.05) | 0.0 | (0.00,1.96) |
| **Age 45-54** | 0 | 0.0 | (0.00,7.62) | 0.0 | (0.00,0.99) | 0.0 | (0.00,0.87) | 0.0 | (0.00,1.03) | 0.0 | (0.00,1.08) | N/A | 0.0 | (0.00,15.523) | 0.0 | (0.00,14.97) | 0.0 | (0.00,2.08) | 0.0 | (0.00,1.89) |
| **Age 55-64** | 18 | 34.3 | (20.32,54.17) | 4.9 | (2.92,7.78) | 2.8 | (1.68,4.48) | 3.0 | (1.77,4.73) | 4.2 | (2.48,6.61) | 50 | 37.2 | (17.03,70.69) | 31.8 | (14.52,60.28) | 5.3 | (2.40,9.98) | 4.6 | (2.12,8.79) |
| **Age 65-74** | 12 | 31.3 | (16.17,54.66) | 2.9 | (1.47,4.98) | 1.6 | (0.84,2.83) | 2.1 | (1.07,3.61) | 2.7 | (1.41,4.75) | 42 | 41.6 | (16.71,85.61) | 23.3 | (7.55,54.26) | 3.4 | (1.38,7.06) | 2.3 | (0.75,5.39) |
| **Age 75-84** | 14 | 62.1 | (33.92,104.11) | 3.2 | (1.77,5.43) | 1.5 | (0.82,2.53) | 2.8 | (1.52,4.67) | 3.5 | (1.91,5.87) | 57 | 70.2 | (25.78,152.90) | 57.1 | (24.63,112.43) | 2.8 | (1.02,6.05) | 3.7 | (1.58,7.22) |
| **Age >=85** | 3 | 39.4 | (8.13,115.27) | 0.6 | (0.12,1.72) | 0.2 | (0.05,0.73) | 0.6 | (0.13,1.78) | 0.7 | (0.14,2.05) | 33 | 92.1 | (11.16,332.78) | 18.4 | (0.47,102.51) | 0.8 | (0.09,2.81) | 0.4 | (0.01,2.16) |
|  |  |  |  |  |  |  |  |  |  |  |  |  |  |  |  |  |  |  |  |  |
| **Un-determined** | 49 | 12.9 | (9.57,17.09) | 11.3 | (8.20,15.27) | 6.5 | (4.20,9.64) | 10.0 | (7.06,13.71) | 11.9 | (8.69,15.93) | 57 | 11.5 | (7.11,17.57) | 14.3 | (9.48,20.62) | 10.1 | (5.99,15.82) | 12.5 | (8.03,18.49) |
| **Age 0-44** | 3 | 1.4 | (0.30,4.18) | 0.8 | (0.168,2.38) | 1.0 | (0.21,3.02) | 0.9 | (0.19,2.73) | 0.8 | (0.17,2.41) | 0 | 2.8 | (0.58,8.18) | 0.0 | (0.00,3.60) | 1.7 | (0.34,4.86) | 0.0 | (0.00,1.96) |
| **Age 45-54** | 3 | 6.2 | (1.28,18.11) | 0.8 | (0.17,2.36) | 0.7 | (0.15,2.07) | 0.8 | (0.17,2.44) | 0.9 | (0.18,2.56) | 100 | 0.0 | (0.00,15.52) | 12.2 | (2.51,35.57) | 0.0 | (0.00,2.08) | 1.5 | (0.32,4.50) |
| **Age 55-64** | 5 | 9.5 | (3.09,22.22) | 1.4 | (0.44,3.19) | 0.8 | (0.26,1.84) | 0.8 | (0.27,1.94) | 1.2 | (0.38,2.71) | 60 | 8.3 | (1.00,29.89) | 10.6 | (2.18,30.93) | 1.2 | (0.14,4.22) | 1.5 | (0.32,4.51) |
| **Age 65-74** | 9 | 23.5 | (10.73,44.55) | 2.1 | (0.978,4.1) | 1.2 | (0.55,2.3) | 1.5 | (0.71,2.94) | 2.0 | (0.93,3.87) | 56 | 23.7 | (6.47,60.79) | 23.3 | (7.55,54.26) | 2.0 | (0.53,5.01) | 2.3 | (0.75,5.39) |
| **Age 75-84** | 15 | 66.5 | (37.21,109.65) | 3.5 | (1.94,5.72) | 1.6 | (0.90,2.66) | 3.0 | (1.67,4.92) | 3.7 | (2.10,6.18) | 47 | 93.7 | (40.44,184.56) | 49.9 | (20.07,102.86) | 3.7 | (1.60,7.31) | 3.2 | (1.29,6.61) |
| **Age >=85** | 14 | 184.1 | (100.63,308.83) | 2.7 | (1.50,4.60) | 1.2 | (0.63,1.95) | 2.9 | (1.56,4.79) | 3.3 | (1.79,5.48) | 71 | 184.2 | (50.20,471.75) | 184.0 | (88.23,338.4) | 1.6 | (0.42,3.98) | 3.9 | (1.86,7.12) |
